# Supplementary material for: The influences of walking, running and stair activity on knee articular cartilage: Quantitative MRI using T1 rho and T2 mapping
Source: PLoS One. 2017 Nov 14;12(11):e0187008. doi: 10.1371/journal.pone.0187008 (PMC5685565; doi:10.1371/journal.pone.0187008)
Supplement: S5 Table — (XLS) [file pone.0187008.s005.xls]

## Sheet: 修改后股骨、胫骨软骨T2 mapping
T2 values of tibiofemoral cartilage in rest, walking, running and stair activity
Participants	Activities	MFC (ms)				MTC (ms)			LFC (ms)				LTC (ms)
		Anterior part	Middle part	Posterior part	PMFC	Anterior part	Middle part	Posterior part	Anterior part	Middle part	Posterior part	PLFC	Anterior part	Middle part	Posterior part
1	1	33.3	33.5	40.111	37.92	31.861	32.88	36.967	32.528	35.9	48.44	39.367	26.92	29.04	38
1	2	33.2	33.133	39.833	35.333	33.611	32.333	34.633	34.467	35	47.44	42.433	26.12	28.8	36.84
1	3	35.88	33.889	38.92	33.25	42.367	34.433	33.5	34.278	33.033	46.067	41.5	27.1	28.167	33.533
1	4	33.639	30.467	39.778	35.833	32.36	31.12	30.944	33.267	32.31	45.7	42.083	25.6	28.52	32.267
2	1	34.72	36.88	45.6	40.067	35.56	34.467	36.833	47.967	39.333	47.433	46.22	31.84	29.267	31.129
2	2	33.583	36.139	44.389	40.467	34.24	33.467	33.933	47.6	38.556	46.472	46	33.4	28.139	30.033
2	3	26.2	35.724	43.64	41.367	32.2	33.28	32.24	46.278	37.767	45.556	44.033	33	31.2	27.233
2	4	28.833	33.2	41.967	41.667	29	32.833	30.267	45.64	31.567	46.278	43.467	30.667	28.139	30.8
3	1	36.667	40.306	45.111	34.139	34.222	36.222	37.055	44.762	40.452	43.119	39.69	30.095	31.262	34.405
3	2	36.524	37.952	45.102	35.333	32.245	34.222	32.024	42.3	39.25	43.361	38.85	30.095	29.905	30.861
3	3	35.222	33.24	44.3	35.36	27.68	31.44	29.861	39.388	38.611	42.056	44.452	26.214	24.224	28.833
3	4	36	38.163	45.222	32.488	36.605	32.143	30.238	33.667	37.791	42.628	41.977	27.881	22.93	27.86
4	1	41.613	42.92	35.333	42.6	38.633	36.8	34.889	41.75	36.633	39.5	33.933	27.028	32.733	35.167
4	2	40.733	39.16	35.72	37.139	36	35.733	32.333	40.16	36.16	37.7	34.267	30.84	31.567	30.444
4	3	39.96	36.3	34.167	36.167	31.72	32.667	30.25	38.867	34.7	34.5	35.033	29.967	30.933	27.767
4	4	36.16	30.92	34.467	42.25	34.033	35.694	30.806	45.611	31.96	35.833	36.111	29.633	24.533	27.4
5	1	43.8	45.767	44.733	40.567	36.667	33.68	38.361	42.36	36.167	46.194	41.96	29.033	34.9	33.667
5	2	40.36	43.267	44.64	41.722	36.6	33.033	35.44	40.312	37.333	46.091	39.727	29.629	32.156	33.4
5	3	37.733	41.667	43.733	40.36	35.833	33.32	34.722	38.036	39.371	45.486	40.344	31	31.629	33.2
5	4	37.533	41.8	43	39.24	31.433	33.4	33.111	36.84	37.727	46.512	36.514	30.939	31.091	34.514
6	1	41.24	33.917	47.92	37.528	32.68	32.722	34.72	42.933	38.92	44.48	37.9	31.028	34.833	33.48
6	2	39.267	33.08	45.833	37.7	32.16	33.133	32.567	42.267	39.08	44.833	32.5	31.16	33.567	32.567
6	3	34	33.472	43.24	37.16	30.3	33.267	30.44	43.867	38.459	43.3	42.2	31.061	36.514	32.545
6	4	35.2	34.511	42.757	36.667	30.771	29.194	31.056	42.433	34.84	44.92	39.88	27	29.778	31.033
7	1	40.133	34	36.528	42.04	35.767	34.194	36.56	42.733	39.25	44.278	41.222	38	30.75	36.84
7	2	39.028	39.972	36.528	37.833	32.889	33.48	34.967	41.611	38.833	43.417	41.267	37.067	29.667	34.08
7	3	38.433	40.533	35.967	43.472	28.567	30.6	30.4	39.72	38.28	41.52	42.56	36.333	26.722	33.533
7	4	38.24	39.433	35.08	42.24	30.72	33.16	31.72	39.767	37.472	43.567	41.556	35.3	29	31.767
8	1	28.472	30.583	42.917	42.028	33.944	31.694	34.889	41.625	40.444	44.028	40	32.389	31.071	36.3
8	2	27.467	33.68	41.76	40.733	33.167	35.633	34.028	45.556	43.72	44.333	40.04	33.72	29.64	36.32
8	3	29.167	33.278	42.444	37.972	40.5	37.167	35.639	45.222	41.361	44.139	42.111	34.889	26.722	35.778
8	4	28.972	39.772	41.528	41.778	34.722	33.944	32.306	42.75	43.083	45.444	41.444	33.25	28.528	37.472
9	1	34.52	40	39.833	37.6	35.5	33.467	36.067	35.875	34.9	38.875	30.938	37.062	32	32.125
9	2	33.438	38.25	38.375	38.438	35.312	33.1	34.562	34.65	33	39.25	31.95	35.6	31.125	32.5
9	3	32.125	36.438	38.65	34.7	35.35	34.938	31.688	33.062	31.562	39.5	35.45	31	30.5	31.188
9	4	35.062	37.562	37.688	39.875	35.062	32.188	31.062	36.562	32.95	39.625	33.2	32.062	33.9	32.438
10	1	38.485	34.028	44.457	43.459	38.875	41.486	41.743	41.444	41.121	42.182	42.242	33.333	35.486	39.03
10	2	36.694	37.7	43.8	42.28	38.1	40.033	38.467	40.52	42.4	42.083	43.28	35.233	37.233	37.733
10	3	32.767	36.567	42.9	39.48	38.7	41.267	36.944	39.367	43.8	41.278	36	37.267	38.556	34.4
10	4	36.72	37.3	39.84	37.417	37.12	38.861	35.167	38.871	42.424	40.867	36.829	35.233	38.1	34.946
11	1	39.5	37.067	43.567	38.767	40.5	38.139	37.917	43.267	41.639	39.694	39.944	39.72	36.567	38.944
11	2	42.233	37.333	42.24	38	39.16	38.1	36.3	41.967	40.2	38.8	32.75	37.633	35.28	36.433
11	3	41.861	37.297	41.818	40.343	42.765	37.758	35.545	38.3	38.611	36.44	36.233	35.5	35	32.8
11	4	38.233	36.867	41.48	38.84	37.833	35.722	30.553	38.4	36.64	37.667	37.68	35.1	32.48	35
12	1	38.92	39.582	44.167	39.1	37.133	37.733	38.4	40.139	40.133	44.233	45.76	35.7	37.567	39.567
12	2	37.333	38.467	42.1	37.967	38.88	38.806	37.04	39.76	39.233	43.6	46.333	34.944	36.067	38.333
12	3	36.733	38	39.767	39.567	39.533	38.1	35.833	38.8	38.567	42.9	44.72	34.7	34.8	36.52
12	4	35.865	39.243	41.914	38.303	42.611	37.97	35.433	45.767	42.667	42.351	37.892	34.086	38.343	34.216
13	1	39.225	40.514	43.636	43.03	39.861	42.848	43.05	38.048	41.6	42.121	39.73	40.778	39.545	36.758
13	2	39.03	39.03	42.576	41.061	39.1	39.73	39.778	35.865	40.152	40	36.824	39.743	37.618	35.351
13	3	39.818	38.1	41.242	39.811	39.794	36.485	37.429	36.259	39.367	38.125	38.05	37.541	38.143	35.371
13	4	35.394	38.8	39.219	39.697	39.394	37.75	37.531	34.265	39.091	39.457	37.588	36.727	37.5	35.351
14	1	43.758	42.15	46.351	42.125	42.125	43.867	42.971	42.12	46.633	42.357	45.121	40.3	41.75	39.844
14	2	41.273	41.788	44.167	44.606	40.595	40.818	39.031	41.943	46.081	41.567	44.094	41.775	40.567	38.389
14	3	39.727	41.514	44.364	42.943	38.081	36.697	37.919	41.25	45.879	40.433	39.273	41.125	40.97	37.424
14	4	41.56	36.743	41.9	40.094	34.433	38.467	37.05	35.297	43.3	41.424	40.156	41.286	38.622	35.76
15	1	38.833	38.64	37.767	36.6	35.533	36.84	35.139	36.714	36.24	38.533	30.3	34	32.333	39.467
15	2	37.444	38.533	37.633	34.833	34.7	35.467	32.84	35.586	35.028	37.133	29.333	32.889	33.333	37.84
15	3	35.88	37.567	36.72	35.267	33.667	33.52	30.042	34.24	35.722	37.9	30.067	31.5	35.083	34.533
15	4	36.4	38.444	37.167	31.24	33.333	35.567	32.583	34.833	35	36.972	29.967	35.278	34.694	33.433
16	1	36.688	40.65	43.062	48.1	39.875	41.188	40.438	35.633	37.4	40.917	38.44	38.433	39.667	38.361
16	2	39.867	36	41.606	38.879	38.371	38.306	38.7	37.35	36.081	40.061	38.143	36.939	37	36.306
16	3	39.6	32.512	38.576	40.595	36.533	34	33.714	35.688	34.925	39.543	35.946	35.333	35	35.758
16	4	39.189	32.167	38.054	39.971	33.6	35.067	36.786	40	33.25	39.125	38.062	38.682	35.5	35.972
17	1	41.857	36.429	39.03	39.135	38.688	38.636	36.697	41.2	40.243	45.543	39.378	38.2	38.667	35.257
17	2	40.188	37.257	38.152	40.182	38.4	37.382	35.048	41.312	39.182	44.125	36.771	37.865	38.394	34.52
17	3	38.968	38.4	37.966	39.091	38.583	37.818	35.56	37.222	38.286	41.057	39.219	36.229	36.033	35.189
17	4	38.667	37.067	37	38.233	35.433	37.933	34.806	39.52	36.438	43.029	38.25	36.033	36.031	34.8
18	1	36.043	33.75	35.125	35.95	36.111	36.76	37.64	42.44	36.133	36.367	34.48	38.6	35.267	37.444
18	2	36.4	34.5	35.52	32.68	35.52	36.1	35.278	39.625	36.233	36.833	31.278	38.067	35.867	36.9
18	3	37.667	33.793	34.52	35.722	34.84	35.056	34.917	39.55	36.438	37.5	35.7	38.417	35.8	35.867
18	4	36.806	34.5	34.45	36.32	35.1	35.677	33.92	36.95	35.367	37.139	31.367	36.233	36.433	35.556
19	1	37.864	39.042	40.694	39	37.5	38.108	36.81	36.062	37.062	38.622	36.25	37.886	39.273	38.088
19	2	37.688	39.6	39.081	41.257	37.222	38.73	35.286	35.211	36.548	37.576	38.719	36.848	38.625	37.042
19	3	36.581	39.967	40.781	41.933	36.857	38.108	34.867	35.5	36.233	37.906	38.4	36.594	38.4	36.273
19	4	34.882	36.618	39.143	42.343	37.9	36.73	34.971	35.125	36.543	36.686	37.647	35.238	37.03	37.5
20	1	38.526	37.208	36.68	31.5	36.2	37.233	38.8	41.2	36	36.52	35	36.5	32.167	35.833
20	2	37.3	37.458	37.2	32.25	36.567	37.208	36.667	39.667	34.6	36.833	35.361	35.306	31.7	34.308
20	3	36.45	37.867	37.125	36.806	37.6	37.24	35.074	37	34.32	38.367	34.972	35.417	31.04	34.08
20	4	36.375	37.52	38.8	36.52	37.05	36.367	35.567	38.727	37.16	37.76	35.933	34.45	32.533	34.52
21	1	35.061	38.946	38.486	31.879	34.486	36.757	38.913	38.176	37.758	42.061	35.108	37.171	37.914	36.219
21	2	37.361	38.2	37.567	37.16	34.071	37.92	37.68	38.688	37.9	41.72	40.833	36.72	38	36.433
21	3	38.2	36.72	37.139	36.389	34.6	36.1	35.889	39.944	39.861	41.833	39.96	36.767	38.733	36.833
21	4	38.96	38.2	40.8	37.611	34.52	37.694	35.65	38.68	39.267	42.889	43.433	37.033	38.433	36.346
22	1	38.52	35.36	39.72	31.233	36.154	36.667	32.35	37.389	32.24	35.467	32.8	37.2	31.167	31.667
22	2	37.567	33.9	37.52	30.694	37.188	34.875	30.85	38.75	31.433	34.861	31.6	36	30.222	29.05
22	3	37.458	31.867	36.9	33.84	37.812	32.633	29.833	39.28	32.611	35.3	30.24	36	31.333	27.5
22	4	37.45	33.967	30.267	29.8	37.92	33.7	30.875	35.438	30.167	34.967	29.556	36.278	29.533	27.833
23	1	38.8	38.08	39.64	40.76	38.28	38.16	39.833	38.55	37.2	42.48	41.139	37.5	36.133	35.833
23	2	38.206	36.811	39.031	35.545	37.619	37.182	36.65	37.722	37.167	42.567	42.5	37.44	36.6	35.389
23	3	37.722	35.3	38.033	38.48	37.867	38.333	35.139	38.32	36.933	42.433	39.125	36.083	35.533	35.688
23	4	38.733	38.233	37.2	37.1	37.524	37.167	35.95	37.958	37.7	41.062	40.9	36.7	36.68	35.04
Annotation: 1 Rest, 2 walking, 3 running, 4 stair activity
